# Supplementary material for: Assessment of isoprene and near surface ozone sensitivities to water stress over the Euro-Mediterranean region
Source: Copernicus journal article supplement (doi:10.5194/egusphere-2022-1522), 2023-02-20
Supplement: Supplementary file [file egusphere-2022-1522-AC3-supplement.pdf]

# Assessment of isoprene and near surface ozone sensitivities to water stress over the Euro-Mediterranean region

Strada, S.<sup>1</sup>, Pozzer, A., Giorgi, F., Giuliani, G., Coppola, E., Solmon, F., Jiang, X., Guenther, A., Bourtsoukidis, E., Serça, D.

## Responses to Reviewers: Figures

---

<sup>1</sup> *Corresponding author:* sstrada@ictp.it

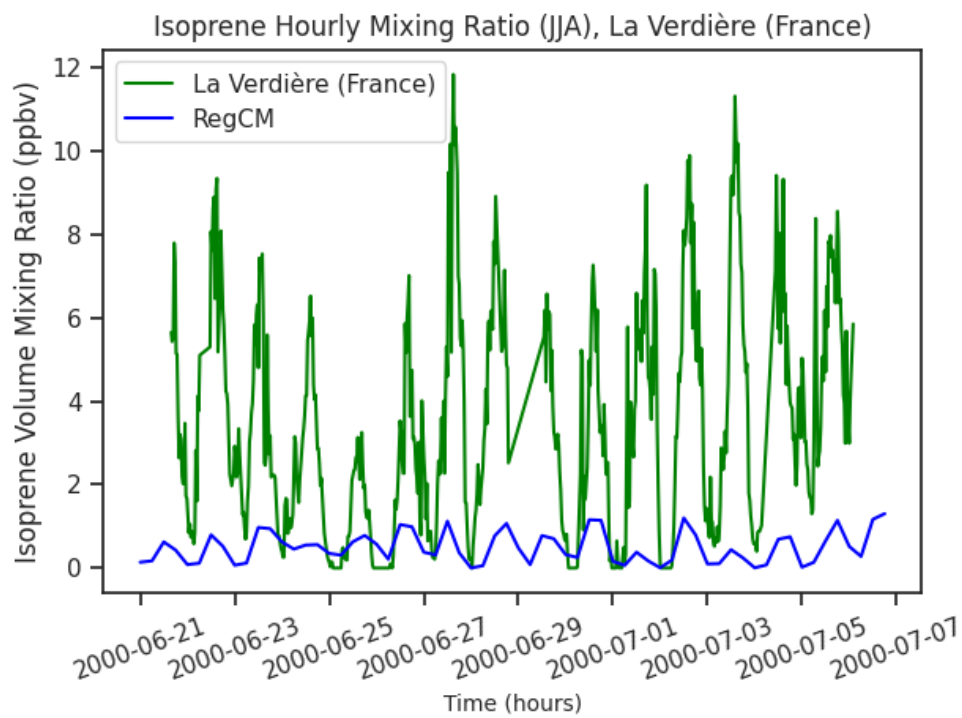

Figure R.1: Comparison of the time-series of isoprene concentrations (units: pptv) collected at La Verdière (Latitude: 43.63° N; Longitude: 5.93° E; France) during the ESCOMPTE filed campaign performed in the summer 2000. The green solid line shows observations, while the blue solid line shows the model output extracted over the nearest grid-cell to the observation spot from the GAMMA-SMoff simulation performed with the RegCM4chem-CLM4.5-MEGAN2.1 model.

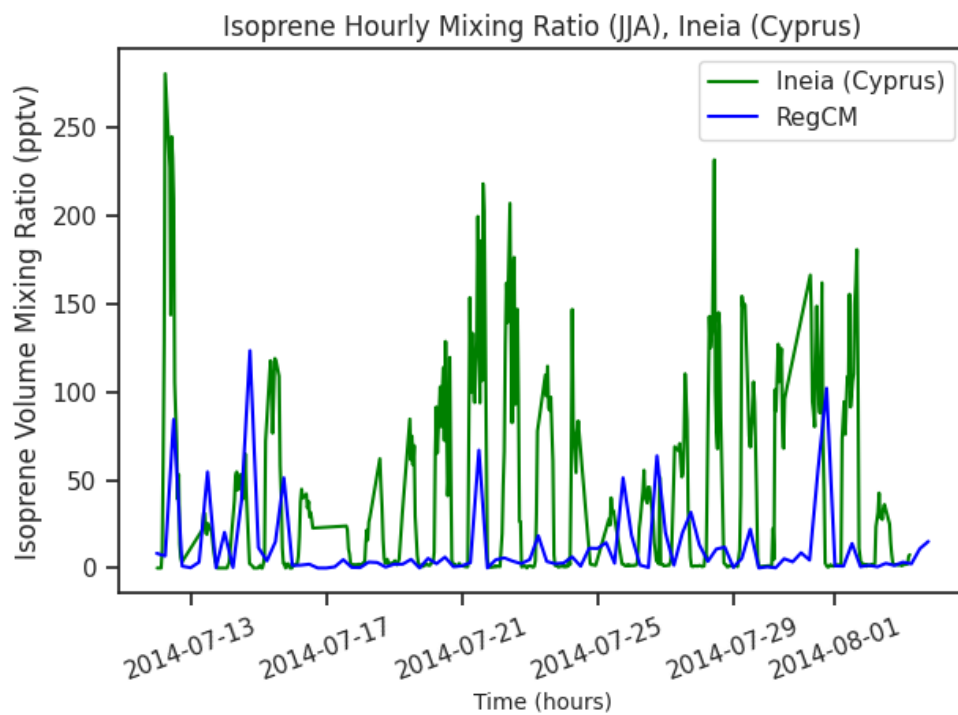

Figure R.2: Comparison of the time-series of isoprene concentrations (units: pptv) collected at Ineia (Latitude: 34.96° N; Longitude: 32.39° E; Cyprus) during the summer 2014. The green solid line shows observations, while the blue solid line shows the model output extracted over the nearest grid-cell to the observation spot from the GAMMA-SMoff simulation performed with the RegCM4chem-CLM4.5-MEGAN2.1 model.

**$\Delta$  Near surface ozone, RegCM4.7 ( $\gamma_{SM=off}$ ) - CAMS, JJA avg**

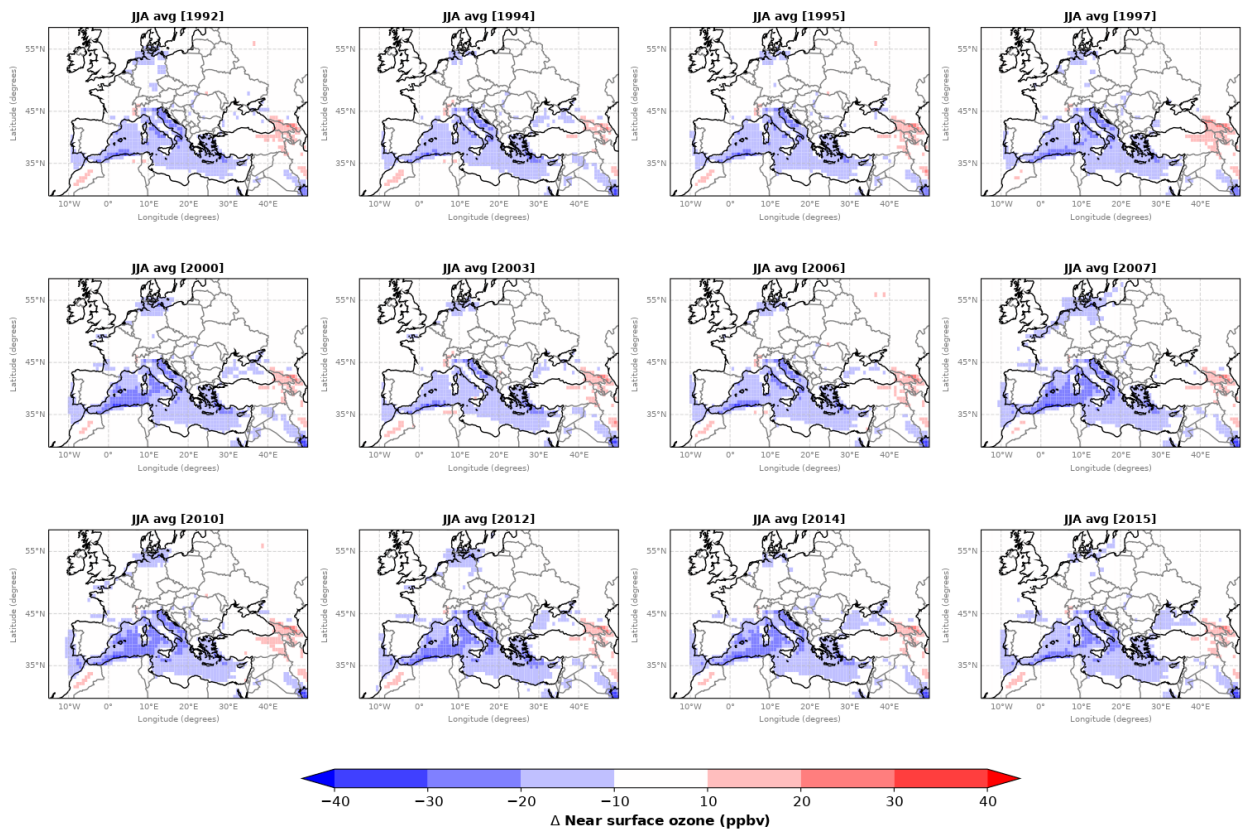

Figure R.3: Spatial distribution of summer-averaged differences in ozone ( $O_3$ ) volume mixing ratio at 1000 hPa (units: ppbv) between the RegCM4-chem model and the CAMS re-analyses.

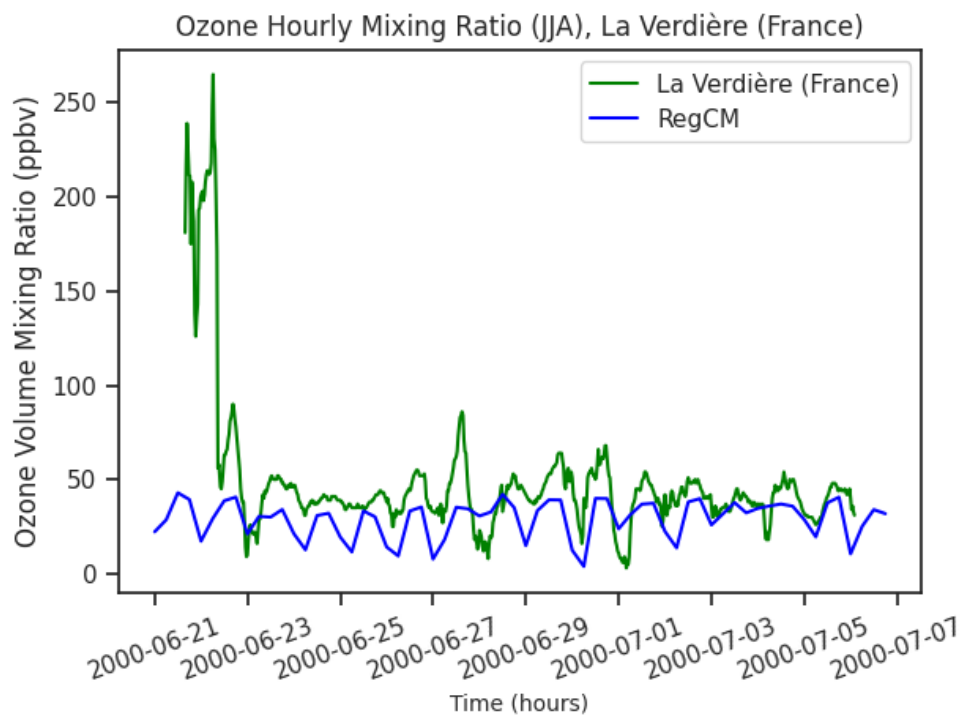

Figure R.4: Comparison of the time-series of near-surface ozone concentrations (units: ppbv) collected at La Verdière (Latitude: 43.63° N; Longitude: 5.93° E; France) during the ESCOMPTE filed campaign performed in the summer 2000. The green solid line shows observations, while the blue solid line shows the model output extracted over the nearest grid-cell to the observation spot from the GAMMA-SMoff simulation performed with the RegCM4chem-CLM4.5-MEGAN2.1 model.

HCHO, RegCM4.7 ( $\gamma_{SM} = off$ ) - CAMS, JJA avg

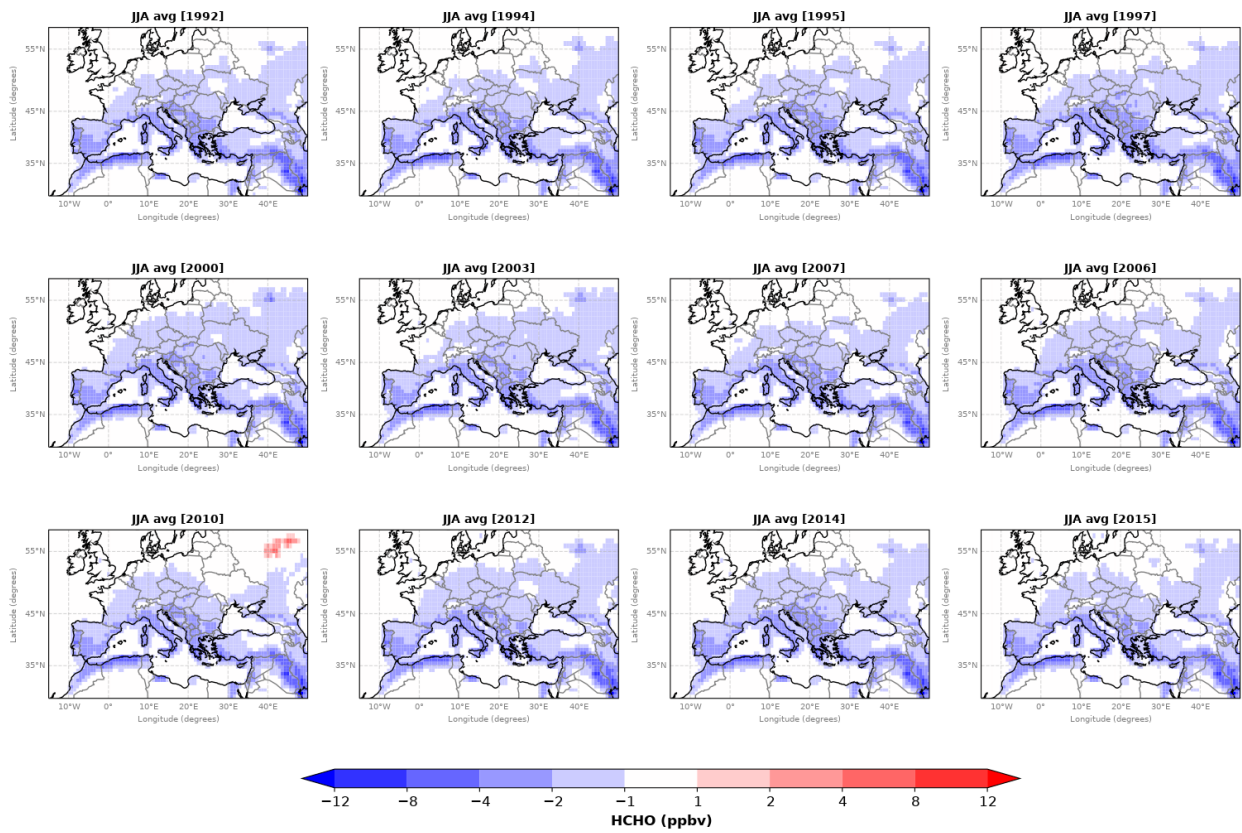

Figure R.5: Spatial distribution of summer-averaged differences in formaldehyde (HCHO) volume mixing ratio at 1000 hPa (units: ppbv) between the RegCM4-chem model and the CAMS re-analyses.

Ozone regime, RegCM4.7 ( $V_{SM} = off$ ) - CAMS, JJA avg

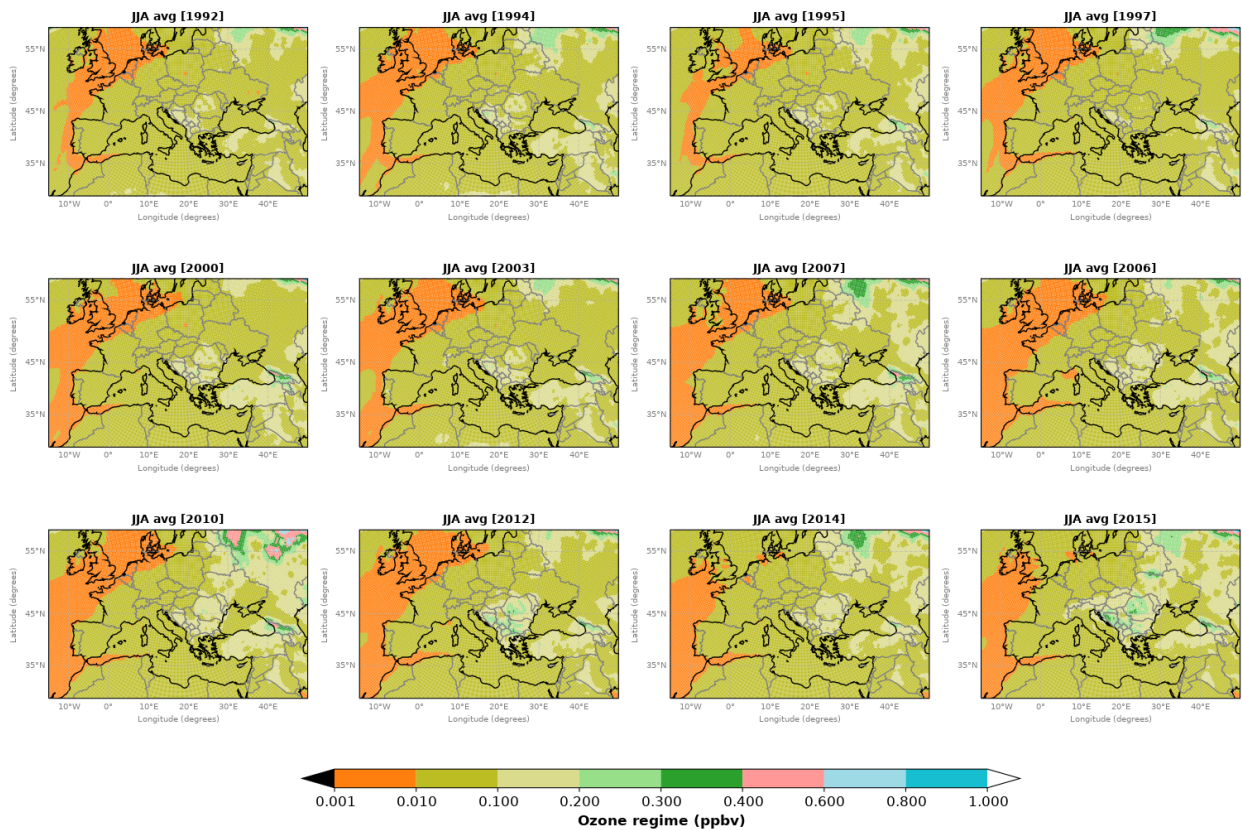

Figure R.6: Spatial distribution of the ratio between formaldehyde (HCHO) and nitrogen di-oxide ( $\text{NO}_2$ ) mass mixing ratios at 1000 hPa as simulated by the RegCM4-chem model. The HCHO/ $\text{NO}_2$  ratio results lower than 1 over the whole domain, indicating that the model reproduces a VOC-limited regime, based on Duncan et al. (2000).
